# Supplementary material
Source: HighWire-hosted journal article supplement (https://bmjopen.bmj.com/content/10/7/e035775)
Supplement: inline-supplementary-material-1 [file inline-supplementary-material-1.pdf]

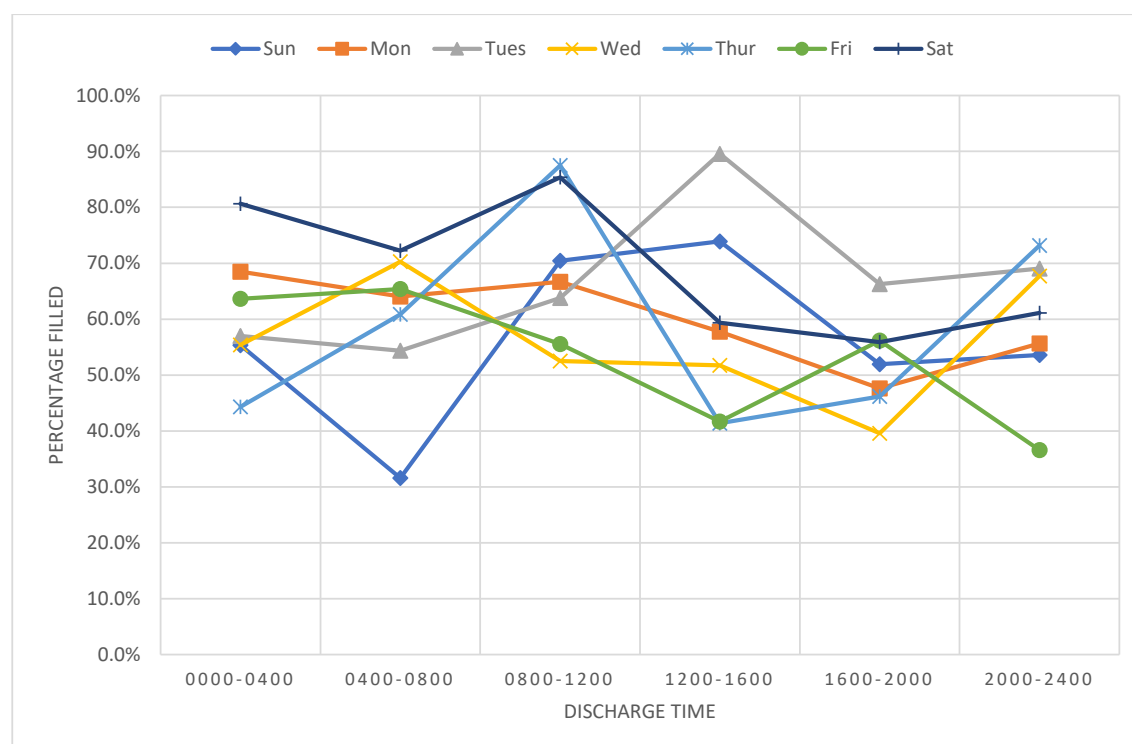

**Supplementary figure 1: Percentage of prescriptions filled for patients discharged from the hospital on different days of the week and times of the day**

**Supplementary table 1: Effect of discharge times and medicines on medication non-adherence**

| Variable        | Levels    | N   | %    | RR   | Lower95% | Upper95% | P-value |
|-----------------|-----------|-----|------|------|----------|----------|---------|
| Discharge dates | Autumn    | 511 | 51.5 | 1.00 |          |          |         |
|                 | Winter    | 481 | 48.5 | 0.94 | 0.84     | 1.04     | 0.2334  |
| Discharge day   | Sun       | 120 | 12.1 | 1.00 |          |          |         |
|                 | Mon       | 238 | 24.0 | 1.00 | 0.82     | 1.22     | 0.9726  |
|                 | Tues      | 173 | 17.4 | 1.12 | 0.92     | 1.38     | 0.2652  |
|                 | Wed       | 127 | 12.8 | 0.97 | 0.77     | 1.21     | 0.7691  |
|                 | Thurs     | 98  | 9.9  | 1.00 | 0.79     | 1.26     | 0.9849  |
|                 | Fri       | 120 | 12.1 | 0.89 | 0.70     | 1.13     | 0.3218  |
|                 | Sat       | 116 | 11.7 | 1.15 | 0.92     | 1.44     | 0.2163  |
| Discharge time  | 0000-0400 | 178 | 17.9 | 1.00 |          |          |         |
|                 | 0400-0800 | 111 | 11.2 | 1.05 | 0.86     | 1.29     | 0.6309  |
|                 | 0800-1200 | 158 | 15.9 | 1.16 | 0.97     | 1.38     | 0.1071  |
|                 | 1200-1600 | 138 | 13.9 | 1.03 | 0.85     | 1.25     | 0.7381  |
|                 | 1600-2000 | 212 | 21.4 | 0.90 | 0.75     | 1.07     | 0.2427  |
|                 | 2000-2400 | 192 | 19.4 | 1.03 | 0.86     | 1.23     | 0.7502  |
|                 | Unknown   | 3   | 0.3  | 0.57 | 0.08     | 4.04     | 0.5715  |
